# Supplementary material
Source: ML conference proceedings conference paper supplement (https://proceedings.neurips.cc/paper_files/paper/2017/hash/09fb05dd477d4ae6479985ca56c5a12d-Abstract.html)
Supplement: Supplementary file [file 09fb05dd477d4ae6479985ca56c5a12d-Supplemental.zip]

---

# Supplementary Materials

## “Adaptive SVRG Methods under Error Bound Conditions with Unknown Growth Parameter”

---

Yi Xu<sup>†</sup>, Qihang Lin<sup>‡</sup>, Tianbao Yang<sup>†</sup>

<sup>†</sup>Department of Computer Science, The University of Iowa, Iowa City, IA 52242, USA

<sup>‡</sup>Department of Management Sciences, The University of Iowa, Iowa City, IA 52242, USA  
 {yi-xu, qihang-lin, tianbao-yang}@uiowa.edu

### 1 Proof of Theorem 2

**Theorem 2.** *Assume that the problem (1) satisfies the HEB condition with  $\theta \in (0, 1/2]$  and  $F(x_0) - F_* \leq \epsilon_0$ , where  $x_0$  is an initial solution. Let  $\eta = 1/(36L)$ , and  $T_1 \geq 81Lc^2(1/\epsilon_0)^{1-2\theta}$ . Then Algorithm 1 ensures*

$$\mathbb{E}[F(\bar{x}^{(R)}) - F_*] \leq (1/2)^R \epsilon_0. \quad (11)$$

*In particular, by running Algorithm 1 with  $R = \lceil \log_2 \frac{\epsilon_0}{\epsilon} \rceil$ , we have  $\mathbb{E}[F(\bar{x}^{(R)}) - F_*] \leq \epsilon$ , and the computational complexity for achieving an  $\epsilon$ -optimal solution in expectation is  $O(n \log(\epsilon_0/\epsilon) + Lc^2 \max\{\frac{1}{\epsilon^{1-2\theta}}, \log(\epsilon_0/\epsilon)\})$ .*

We need the following lemma to prove Theorem 2, which has been established in previous work [2].

**Lemma 3.** *For the  $r$ -th outer loop of Algorithm 1, for any  $x_* \in \Omega_*$  we have*

$$2\eta(1 - 4L\eta)T_r \mathbb{E}[F(\bar{x}^{(r)}) - F(x_*)] \leq \mathbb{E}[\|\bar{x}^{(r-1)} - x_*\|_2^2] + 8L\eta^2(T_r + 1)\mathbb{E}[F(\bar{x}^{(r-1)}) - F(x_*)]. \quad (12)$$

*Proof of Theorem 2.* Denote by  $\epsilon_r = \epsilon_0/2^r$ . We will prove (11) by induction. Assume that  $\mathbb{E}[F(\bar{x}^{(r-1)}) - F(x_*)] \leq \epsilon_{r-1}$ , which is true for  $r = 1$ . Let  $x_*$  in Lemma 3 be the closest optimal solution to  $\bar{x}^{(r-1)}$ . Taking expectation over all random variables on both sides of (12), we get

$$\begin{aligned} \mathbb{E}[F(\bar{x}^{(r)}) - F_*] &\leq \frac{1}{2\eta(1 - 4L\eta)T_r} \mathbb{E}\|\bar{x}^{(r-1)} - x_*\|_2^2 + \frac{4L\eta(T_r + 1)}{(1 - 4L\eta)T_r} \mathbb{E}[F(\bar{x}^{(r-1)}) - F_*] \\ &\leq \frac{1}{2\eta(1 - 4L\eta)T_r} c^2 \mathbb{E}[F(\bar{x}^{(r-1)}) - F_*]^{2\theta} + \frac{4L\eta(T_r + 1)}{(1 - 4L\eta)T_r} \mathbb{E}[F(\bar{x}^{(r-1)}) - F_*] \\ &\leq \frac{1}{2\eta(1 - 4L\eta)T_r} c^2 (\mathbb{E}[F(\bar{x}^{(r-1)}) - F_*])^{2\theta} + \frac{4L\eta(T_r + 1)}{(1 - 4L\eta)T_r} \mathbb{E}[F(\bar{x}^{(r-1)}) - F_*], \end{aligned}$$

where the second inequality uses the HEB condition and the last inequality uses the concavity of  $x^{2\theta}$  for  $x \geq 0$  and  $2\theta \leq 1$ . By noting the values of  $\eta = \frac{1}{36L}$  and  $T_r \geq 81Lc^2\epsilon_{r-1}^{2\theta-1}$ ,

$$\frac{1}{2\eta(1 - 4L\eta)T_r} c^2 \epsilon_{r-1}^{2\theta} \leq \frac{\epsilon_{r-1}}{4}, \quad \frac{4L\eta(T_r + 1)}{(1 - 4L\eta)T_r} \epsilon_{r-1} \leq \frac{\epsilon_{r-1}}{4}.$$

Thus  $\mathbb{E}[F(\bar{x}^{(r)}) - F_*] \leq \frac{\epsilon_{r-1}}{2} \triangleq \epsilon_r$ . We can complete the proof in light of  $R = \lceil \log_2 \frac{\epsilon_0}{\epsilon} \rceil$ .  $\square$

## 2 Proof of Lemma 3

*Proof.* First, we can write the update of  $x_t^{(r)} = \arg \min_{x \in \mathbb{R}^d} \frac{1}{2} \|x - (x_{t-1}^{(r)} - \eta g_t^{(r)})\|_2^2 + \eta \Psi(x)$ , and we know that  $\frac{1}{2} \|x - (x_{t-1}^{(r)} - \eta g_t^{(r)})\|_2^2 + \eta \Psi(x)$  is 1-strongly convex w.r.t.  $\|\cdot\|_2$  in terms of  $x$ . By the first-order optimality condition, for any  $x$  we get

$$\frac{1}{2} \|x - (x_{t-1}^{(r)} - \eta g_t^{(r)})\|_2^2 + \eta \Psi(x) \geq \frac{1}{2} \|x_t^{(r)} - (x_{t-1}^{(r)} - \eta g_t^{(r)})\|_2^2 + \eta \Psi(x_t^{(r)}) + \frac{1}{2} \|x_t^{(r)} - x\|_2^2.$$

Rewrite above inequality, then

$$\begin{aligned} \eta \Psi(x_t^{(r)}) - \eta \Psi(x) &\leq \frac{1}{2} \|x_{t-1}^{(r)} - x\|_2^2 - \frac{1}{2} \|x_t^{(r)} - x\|_2^2 - \frac{1}{2} \|x_t^{(r)} - x_{t-1}^{(r)}\|_2^2 + \eta \langle g_t^{(r)}, x - x_t^{(r)} \rangle \\ &= \frac{1}{2} \|x_{t-1}^{(r)} - x\|_2^2 - \frac{1}{2} \|x_t^{(r)} - x\|_2^2 + \eta \langle g_t^{(r)} - \nabla f(x_{t-1}^{(r)}), x - x_t^{(r)} \rangle \\ &\quad + \eta \langle \nabla f(x_{t-1}^{(r)}), x_{t-1}^{(r)} - x_t^{(r)} \rangle - \frac{1}{2} \|x_t^{(r)} - x_{t-1}^{(r)}\|_2^2 \\ &\quad + \eta \langle \nabla f(x_{t-1}^{(r)}), x - x_{t-1}^{(r)} \rangle. \end{aligned} \tag{13}$$

Since  $f$  is  $L$ -smooth and  $0 < \eta \leq \frac{1}{L}$ ,

$$\begin{aligned} f(x_t^{(r)}) - f(x_{t-1}^{(r)}) &\leq \langle \nabla f(x_{t-1}^{(r)}), x_t^{(r)} - x_{t-1}^{(r)} \rangle + \frac{L}{2} \|x_t^{(r)} - x_{t-1}^{(r)}\|_2^2 \\ &\leq \langle \nabla f(x_{t-1}^{(r)}), x_t^{(r)} - x_{t-1}^{(r)} \rangle + \frac{1}{2\eta} \|x_t^{(r)} - x_{t-1}^{(r)}\|_2^2. \end{aligned}$$

That is,

$$\eta \langle \nabla f(x_{t-1}^{(r)}), x_{t-1}^{(r)} - x_t^{(r)} \rangle - \frac{1}{2} \|x_t^{(r)} - x_{t-1}^{(r)}\|_2^2 \leq \eta [f(x_{t-1}^{(r)}) - f(x_t^{(r)})]. \tag{14}$$

By the convexity of  $f$ , we get

$$\langle \nabla f(x_{t-1}^{(r)}), x - x_{t-1}^{(r)} \rangle \leq f(x) - f(x_{t-1}^{(r)}). \tag{15}$$

Plugging in inequalities (14) and (15) into inequality (13), we get

$$\begin{aligned} F(x_t^{(r)}) - F(x) &\leq \frac{1}{2\eta} \|x_{t-1}^{(r)} - x\|_2^2 - \frac{1}{2\eta} \|x_t^{(r)} - x\|_2^2 - \langle g_t^{(r)} - \nabla f(x_{t-1}^{(r)}), x_t^{(r)} - x \rangle \\ &= \frac{1}{2\eta} \|x_{t-1}^{(r)} - x\|_2^2 - \frac{1}{2\eta} \|x_t^{(r)} - x\|_2^2 - \langle g_t^{(r)} - \nabla f(x_{t-1}^{(r)}), \hat{x}_t^{(r)} - x \rangle \\ &\quad - \langle g_t^{(r)} - \nabla f(x_{t-1}^{(r)}), x_t^{(r)} - \hat{x}_t^{(r)} \rangle \\ &\leq \frac{1}{2\eta} \|x_{t-1}^{(r)} - x\|_2^2 - \frac{1}{2\eta} \|x_t^{(r)} - x\|_2^2 - \langle g_t^{(r)} - \nabla f(x_{t-1}^{(r)}), \hat{x}_t^{(r)} - x \rangle \\ &\quad + \|g_t^{(r)} - \nabla f(x_{t-1}^{(r)})\|_2 \|x_t^{(r)} - \hat{x}_t^{(r)}\|_2 \\ &\leq \frac{1}{2\eta} \|x_{t-1}^{(r)} - x\|_2^2 - \frac{1}{2\eta} \|x_t^{(r)} - x\|_2^2 - \langle g_t^{(r)} - \nabla f(x_{t-1}^{(r)}), \hat{x}_t^{(r)} - x \rangle \\ &\quad + \|g_t^{(r)} - \nabla f(x_{t-1}^{(r)})\|_2 \|x_{t-1}^{(r)} - \eta g_t^{(r)} - (x_{t-1}^{(r)} - \eta \nabla f(x_{t-1}^{(r)}))\|_2 \\ &= \frac{1}{2\eta} \|x_{t-1}^{(r)} - x\|_2^2 - \frac{1}{2\eta} \|x_t^{(r)} - x\|_2^2 - \langle g_t^{(r)} - \nabla f(x_{t-1}^{(r)}), \hat{x}_t^{(r)} - x \rangle \\ &\quad + \eta \|g_t^{(r)} - \nabla f(x_{t-1}^{(r)})\|_2^2, \end{aligned} \tag{16}$$

where  $\hat{x}_t^{(r)} = \arg \min_{x \in \mathbb{R}^d} \frac{1}{2} \|x - (x_{t-1}^{(r)} - \eta \nabla f(x_{t-1}^{(r)}))\|_2^2 + \eta \Psi(x)$ . Please notice that the update of  $\hat{x}_t^{(r)}$  is not used in the Algorithm, but only for analysis. Letting  $x = x_*$  and taking expectation over both sides, we have

$$\begin{aligned} 2\eta \mathbb{E}[F(x_t^{(r)}) - F(x_*)] &\leq \|x_{t-1}^{(r)} - x_*\|_2^2 - \mathbb{E}[\|x_t^{(r)} - x_*\|_2^2] + 2\eta^2 \mathbb{E}[\|g_t^{(r)} - \nabla f(x_{t-1}^{(r)})\|_2^2] \\ &\leq \|x_{t-1}^{(r)} - x_*\|_2^2 - \mathbb{E}[\|x_t^{(r)} - x_*\|_2^2] \\ &\quad + 8L\eta^2 [F(x_{t-1}^{(r)}) - F(x_*) + F(\bar{x}^{(r-1)}) - F(x_*)], \end{aligned}$$

where we use the fact that  $\mathbb{E}[\langle g_t^{(r)} - \nabla f(x_{t-1}^{(r)}), \hat{x}_t^{(r)} - x \rangle] = 0$  and use Corollary 3.5 in [2] to upper bound the expected variance  $\mathbb{E}[\|g_t^{(r)} - \nabla f(x_{t-1}^{(r)})\|_2^2]$ . Then

$$\begin{aligned} \mathbb{E}[\|x_t^{(r)} - x_*\|_2^2] &\leq \|x_{t-1}^{(r)} - x_*\|_2^2 - 2\eta\mathbb{E}[F(x_t^{(r)}) - F(x_*)] \\ &\quad + 8L\eta^2[F(x_{t-1}^{(r)}) - F(x_*) + F(\bar{x}^{(r-1)}) - F(x_*)]. \end{aligned} \quad (17)$$

For a fixed  $r$ , by summing the previous inequality over  $t = 1, \dots, T$  and taking expectation with respect to the history of random variables sequence  $i_1, i_2, \dots, i_T$ , we obtain

$$\begin{aligned} &2\eta(1 - 4L\eta) \sum_{t=1}^{T-1} \mathbb{E}[F(x_t^{(r)}) - F(x_*)] \\ &\leq \|x_0^{(r)} - x_*\|_2^2 - \mathbb{E}[\|x_T^{(r)} - x_*\|_2^2] - 2\eta\mathbb{E}[F(x_T^{(r)}) - F(x_*)] \\ &\quad + 8L\eta^2[F(x_0^{(r)}) - F(x_*) + T(F(\bar{x}^{(r-1)}) - F(x_*))] \\ &\leq \|x_0^{(r)} - x_*\|_2^2 + 8L\eta^2[F(x_0^{(r)}) - F(x_*) + T(F(\bar{x}^{(r-1)}) - F(x_*))] \\ &= \|x_0^{(r)} - x_*\|_2^2 + 8L\eta^2(T+1)[F(x_0^{(r)}) - F(x_*)], \end{aligned} \quad (18)$$

where the last inequality uses the facts that  $-\mathbb{E}[\|x_T^{(r)} - x_*\|_2^2] \leq 0$  and  $-2\eta\mathbb{E}[F(x_T^{(r)}) - F(x_*)] \leq 0$ , and the last equality uses  $x_0^{(r)} = \bar{x}^{(r-1)}$ . By the convexity of  $F(x)$  and the definition of  $\bar{x}^{(r)}$  and  $x_0^{(r)} = \bar{x}^{(r-1)}$  we have

$$2\eta(1 - 4L\eta)TE[F(\bar{x}^{(r)}) - F(x_*)] \leq \|\bar{x}^{(r-1)} - x_*\|_2^2 + 8L\eta^2(T+1)[F(\bar{x}^{(r-1)}) - F(x_*)]. \quad (19)$$

□

### 3 Proof of Theorem 3

**Theorem 3.** Assume that the problem (1) satisfies the HEB with  $\theta \in (0, 1/2)$  and  $F(x_0) - F_* \leq \epsilon_0$ , where  $x_0$  is an initial solution, and  $c_0 \leq c$ . Let  $\epsilon \leq \frac{\epsilon_0}{2}$ ,  $R = \lceil \log_2 \frac{\epsilon_0}{\epsilon} \rceil$  and  $T_1^{(1)} = 81Lc_0^2(1/\epsilon_0)^{1-2\theta}$ . Then with at most a total number of  $S = \left\lceil \frac{1}{\frac{1}{2}-\theta} \log_2 \left( \frac{c}{\epsilon_0} \right) \right\rceil + 1$  calls of SVRG<sup>HEB</sup> in Algorithm 2, we find a solution  $x^{(S)}$  such that  $\mathbb{E}[F(x^{(S)}) - F_*] \leq \epsilon$ . The computational complexity of SVRG<sup>HEB-RS</sup> for obtaining such an  $\epsilon$ -optimal solution is  $O\left(n \log(\epsilon_0/\epsilon) \log(c/c_0) + \frac{Lc^2}{\epsilon^{1-2\theta}}\right)$ .

*Proof.* Denote by  $c_{s+1} = 2^{\frac{1-2\theta}{2}} c_s$ . Since  $c \geq c_0$  and  $\frac{2}{1-2\theta} > 2$ , we have  $F(x_0) - F_* \leq \epsilon_0 \left(\frac{c}{c_0}\right)^{\frac{2}{1-2\theta}}$ . Following the proof of Theorem 2, we can show that

$$\mathbb{E}[F(x^{(1)}) - F_*] \leq \left(\frac{1}{2}\right)^R \epsilon_0 \left(\frac{c}{c_0}\right)^{\frac{2}{1-2\theta}} = \epsilon \left(\frac{c}{c_0}\right)^{\frac{2}{1-2\theta}} \quad (20)$$

with  $R = \lceil \log_2 \frac{\epsilon_0}{\epsilon} \rceil$  and  $T_1^{(1)} = 81Lc_0^2 \left(\frac{1}{\epsilon_0}\right)^{1-2\theta} = 81Lc^2 \left(\frac{1}{\epsilon_0 \left(\frac{c}{c_0}\right)^{\frac{2}{1-2\theta}}}\right)^{1-2\theta}$ . Next, since  $\epsilon \leq \frac{\epsilon_0}{2}$ ,

then we have  $\mathbb{E}[F(x^{(1)}) - F_*] \leq \frac{\epsilon_0}{2} \left(\frac{c}{c_0}\right)^{\frac{2}{1-2\theta}} = \epsilon_0 \left(\frac{c}{c_1}\right)^{\frac{2}{1-2\theta}}$ . By running SVRG<sup>heb</sup> from  $x^{(1)}$  with  $T_1^{(2)} = 81Lc_1^2 \left(\frac{1}{\epsilon_0}\right)^{1-2\theta} = 81Lc^2 \left(\frac{1}{\epsilon_0 \left(\frac{c}{c_1}\right)^{\frac{2}{1-2\theta}}}\right)^{1-2\theta}$ , Theorem 2 ensures that

$$\mathbb{E}[F(x^{(2)}) - F_*] \leq \left(\frac{1}{2}\right)^R \epsilon_0 \left(\frac{c}{c_1}\right)^{\frac{2}{1-2\theta}} = \epsilon \left(\frac{c}{c_1}\right)^{\frac{2}{1-2\theta}}. \quad (21)$$

By continuing the process, with  $S = \left\lceil \frac{2}{1-2\theta} \log_2 \left( \frac{c}{c_0} \right) \right\rceil + 1$ , we have

$$\mathbb{E}[F(x^{(S)}) - F_*] \leq \left(\frac{1}{2}\right)^R \epsilon_0 \left(\frac{c}{c_{S-1}}\right)^{\frac{2}{1-2\theta}} = \epsilon \left(\frac{c}{c_{S-1}}\right)^{\frac{2}{1-2\theta}} \leq \epsilon. \quad (22)$$

The total number of iterations for the  $S$  calls of SVRG<sup>heb</sup> is upper bounded by

$$\begin{aligned} T_{\text{total}} &= \sum_{s=0}^{S-1} \left( nR + \sum_{r=1}^R T_1^{(s+1)} 2^{(1-2\theta)(r-1)} \right) = nRS + \sum_{s=0}^{S-1} T_1^{(s+1)} \sum_{r=1}^R 2^{(1-2\theta)(r-1)} \\ &= nRS + \sum_{s=0}^{S-1} T_1^{(1)} 2^{(1-2\theta)s} \sum_{r=1}^R 2^{(1-2\theta)(r-1)} \\ &\leq O \left( n \log(\epsilon_0/\epsilon) \log(c/c_0) + \left(\frac{c}{c_0}\right)^2 \left(\frac{\epsilon_0}{\epsilon}\right)^{1-2\theta} T_1^{(1)} \right) \\ &\leq O \left( n \log(\epsilon_0/\epsilon) \log(c_0) + \frac{Lc^2}{\epsilon^{1-2\theta}} \right). \end{aligned}$$

□

## 4 Omitted Proof of Lemma 2

**Lemma 4.** Let  $\bar{x} = \arg \min_{x \in \Omega} \langle \nabla f(\tilde{x}), x - \tilde{x} \rangle + \frac{L}{2} \|x - \tilde{x}\|_2^2 + \Psi(x)$ . Assume that  $f(x)$  is  $L$ -smooth, we have

$$F(\tilde{x}) - F_* \geq \frac{L}{2} \|\bar{x} - \tilde{x}\|^2. \quad (23)$$

*Proof.* Since  $f(x)$  is  $L$ -smooth, then we get

$$f(\bar{x}) - f(\tilde{x}) \leq \langle \nabla f(\tilde{x}), \bar{x} - \tilde{x} \rangle + \frac{L}{2} \|\bar{x} - \tilde{x}\|_2^2. \quad (24)$$

By the definition of  $\bar{x}$  and the strong convexity of  $L(x) = \langle \nabla f(\tilde{x}), x - \tilde{x} \rangle + \frac{L}{2} \|x - \tilde{x}\|_2^2 + \Psi(x)$ , we have

$$\langle \nabla f(\tilde{x}), \bar{x} - \tilde{x} \rangle + \frac{L}{2} \|\bar{x} - \tilde{x}\|_2^2 + \Psi(\bar{x}) \leq \Psi(\tilde{x}) - \frac{L}{2} \|\bar{x} - \tilde{x}\|_2^2. \quad (25)$$

Combining inequalities (24) and (25) with the fact that  $F(x) = f(x) + \Psi(x)$  yields

$$F(\tilde{x}) - F(\bar{x}) \geq \frac{L}{2} \|\bar{x} - \tilde{x}\|^2.$$

We complete the proof by using  $F(\bar{x}) \geq F_*$ . □

## 5 Proof of Lemma 1

**Lemma 1.** Let  $\bar{x} = \arg \min_{x \in \Omega} \langle \nabla f(\tilde{x}), x - \tilde{x} \rangle + \frac{L}{2} \|x - \tilde{x}\|_2^2 + \Psi(x)$ . Then under the QEB condition of the problem (1), we have

$$F(\bar{x}) - F_* \leq (L + L_f)^2 c^2 \|\bar{x} - \tilde{x}\|_2^2. \quad (26)$$

Before delving into the detailed analysis, we first present some lemmas.

**Lemma 5** (Theorem 1 [1]). For a constant  $L > 0$  and  $y \in \Omega$ , if

$$v = \arg \min_{z \in \Omega} \left\{ f(y) + \langle \nabla f(y), z - y \rangle + \frac{L}{2} \|z - y\|_2^2 + \Psi(z) \right\},$$

then for any  $x \in \Omega$ ,

$$\langle F'(v), x - v \rangle \geq -(L + L_f) \|v - y\|_2 \|v - x\|_2. \quad (27)$$

*Proof.* By the first order optimality condition, for any  $x \in \Omega$ ,

$$\langle \nabla f(y) + \Psi'(v) + L(v - y), x - v \rangle \geq 0,$$

where  $\Psi'(v) \in \partial\Psi(v)$ , the set of subgradient of  $\Psi$  at  $v$ . Then

$$\begin{aligned} \langle \nabla f(v) + \Psi'(v), v - x \rangle &\leq \langle \nabla f(v) - \nabla f(y) - L(v - y), v - x \rangle \\ &= \langle \nabla f(v) - \nabla f(y), v - x \rangle - L\langle v - y, v - x \rangle \\ &\leq \|\nabla f(v) - \nabla f(y)\|_2 \|v - x\|_2 + L\|v - y\|_2 \|v - x\|_2 \\ &\leq (L_f + L)\|v - y\|_2 \|v - x\|_2. \end{aligned}$$

where the last inequality uses the smoothness of  $f$ . We complete the proof by using  $F'(v) = \nabla f(v) + \Psi'(v)$ .  $\square$

**Lemma 6.** *Suppose that the problem (1) satisfies the QEB condition (2) and then for any  $y, v$  defined in Lemma 5, we have*

$$\|v - v_*\|_2 \leq (L_f + L)c^2\|v - y\|_2, \quad (28)$$

where  $v_*$  is the closest optimal solution to  $v$ .

*Proof.* By the proof of Lemma 5, we have

$$\begin{aligned} (L_f + L)\|v - y\|_2 \|v - v_*\|_2 &\geq \langle \nabla f(v) + \Psi'(v), v - v_* \rangle \\ &= \langle F'(v), v - x_* \rangle \geq F(v) - F_* \geq \frac{1}{c^2}\|v - v_*\|_2^2, \end{aligned}$$

where the second inequality uses the convexity of  $F$  and the last inequality uses the quadratic error bound condition (2).  $\square$

**Lemma 7.** *Assume that the problem (1) satisfies the QEB. Let  $\bar{x} = \arg \min_{x \in \Omega} \langle \nabla f(\tilde{x}), x - \tilde{x} \rangle + \frac{L}{2}\|x - \tilde{x}\|_2^2 + \Psi(x)$ . Then we have*

$$F(\bar{x}) - F_* \leq (L + L_f)^2 c^2 \|\bar{x} - \tilde{x}\|_2^2. \quad (29)$$

*Proof.* Let  $x_*$  denote the closest optimal solution to  $\bar{x}^{(s+1)}$ . By Lemma 6 in the supplement, we have

$$\|\bar{x} - x_*\| \leq (L + L_f)c^2\|\bar{x} - \tilde{x}\|.$$

By Lemma 5 in the supplement and the convexity of  $F$ , we have

$$F(\bar{x}) - F_* \leq -\langle F'(\bar{x}), x_* - \bar{x} \rangle \leq (L + L_f)\|\bar{x} - \tilde{x}\|\|\bar{x} - x_*\|.$$

Combining the two inequalities above together leads to

$$F(\bar{x}) - F_* \leq (L + L_f)^2 c^2 \|\bar{x} - \tilde{x}\|_2^2. \quad \square$$

## References

- [1] Y. Nesterov. Gradient methods for minimizing composite functions. *Mathematical Programming*, 140(1):125–161, 2013.
- [2] L. Xiao and T. Zhang. A proximal stochastic gradient method with progressive variance reduction. *SIAM Journal on Optimization*, 24(4):2057–2075, 2014.
